# Supplementary material for: The immunostimulatory effects and pro‐apoptotic activity of rhCNB against Lewis lung cancer is mediated by Toll‐like receptor 4
Source: PubMed Central journal article supplement (PMC6675711; doi:10.1002/cam4.2158), 2019-06-20
Supplement: CAM4-8-4441-s001.pdf [file CAM4-8-4441-s001.pdf]

**The immunostimulatory effects and pro-apoptosis activity of rhCnB  
against LLC is mediated by Toll-like receptor 4.**

Jinju Yang<sup>1,2</sup>, Hongwei Zhang<sup>1</sup>, Ziwei Zhu, Rui Yang<sup>1</sup>, Yadan Gao<sup>1</sup>, Benqiong Xiang<sup>1\*</sup> and Qun Wei<sup>1\*</sup>

<sup>1</sup>Department of Biochemistry and Molecular Biology, Beijing Normal University, Gene Engineering and Biotechnology Beijing Key Laboratory, Beijing, 100875, P. R. of China;

<sup>2</sup>National Key Laboratory of Biochemical Engineering, Institute of Process Engineering, Chinese Academy of Sciences, Beijing 100190, China.

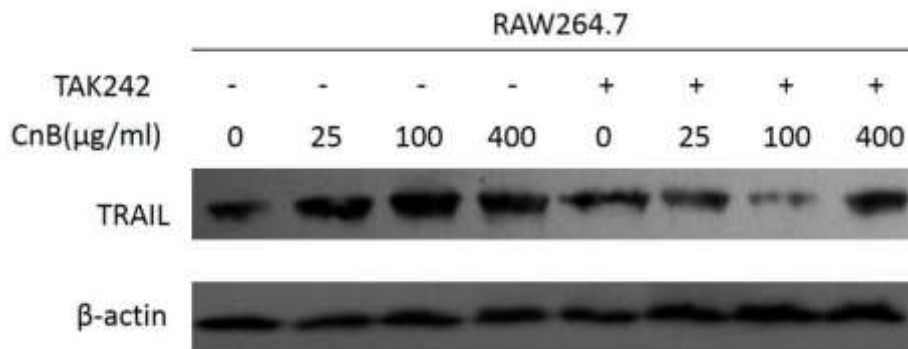

**Figure S1. rhCnB up-regulated the expression of the trail protein in a dose-dependent manner, but TAK242 inhibited the expression.**  $1 \times 10^6$  RAW264.7 cells were plated in 12-well dishes and co-incubated with the different doses of rhCnB in the absence or presence of TAK242 for 48h. the cells were collected for western blot analysis.
